# Supplementary material
Source: HighWire-hosted journal article supplement (https://www.life-science-alliance.org/content/6/7/e202301950/F3)

# Original source data Figure 2B

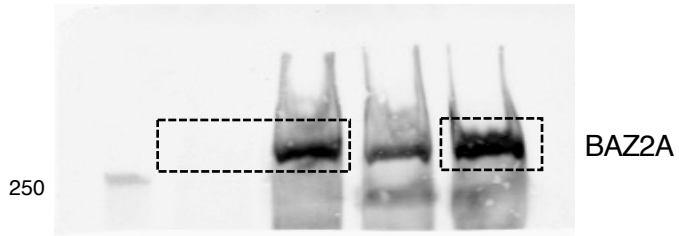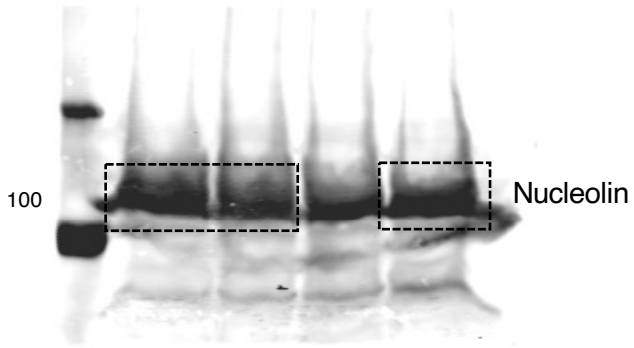

Supplement: inline-supplementary-material-2 [file inline-supplementary-material-2.pdf]
